# Supplementary material for: Metagenomic Functional Shifts to Plant Induced Environmental Changes
Source: Front Microbiol. 2019 Jul 26;10:1682. doi: 10.3389/fmicb.2019.01682 (PMC6676915; doi:10.3389/fmicb.2019.01682)
Supplement: Supplementary file 9 [file Table_6.XLSX]

## Sheet: Table_S6_nodes_pathways_new.csv
Table S6. Distribution of KEGG pathways in co-occurrence network
Name	Annotation	Pathway	More_rel_abund	Relative abundance, %	Module
ko00010	1.1 Carbohydrate metabolism	ko00010: Glycolysis / Gluconeogenesis	equal	1.05268	Sub-network 1
ko00030	1.1 Carbohydrate metabolism	ko00030: Pentose phosphate pathway	Bulk	1.53392	Sub-network 1
ko00051	1.1 Carbohydrate metabolism	ko00051: Fructose and mannose metabolism	equal	0.486629	Sub-network 1
ko00520	1.1 Carbohydrate metabolism	ko00520: Amino sugar and nucleotide sugar metabolism	Bulk	0.726671	Sub-network 1
ko00020	1.1 Carbohydrate metabolism	ko00020: Citrate cycle (TCA cycle)	equal	1.36341	Sub-network 1
ko00521	1.10 Biosynthesis of other secondary metabolites	ko00521: Streptomycin biosynthesis	equal	1.20497	Sub-network 1
ko00720	1.2 Energy metabolism	ko00720: Carbon fixation pathways in prokaryotes	equal	1.21226	Sub-network 1
ko00710	1.2 Energy metabolism	ko00710: Carbon fixation in photosynthetic organisms	equal	1.23284	Sub-network 1
ko00920	1.2 Energy metabolism	ko00920: Sulfur metabolism	equal	1.04847	Sub-network 1
ko00061	1.3 Lipid metabolism	ko00061: Fatty acid biosynthesis	Bulk	1.95107	Sub-network 1
ko00250	1.5 Amino acid metabolism	ko00250: Alanine, aspartate and glutamate metabolism	equal	1.19587	Sub-network 1
ko00400	1.5 Amino acid metabolism	ko00400: Phenylalanine, tyrosine and tryptophan biosynthesis	Bulk	0.82063	Sub-network 1
ko00270	1.5 Amino acid metabolism	ko00270: Cysteine and methionine metabolism	equal	1.04864	Sub-network 1
ko00450	1.6 Metabolism of other amino acids	ko00450: Selenocompound metabolism	equal	1.28575	Sub-network 1
ko00510	1.7 Glycan biosynthesis and metabolism	ko00510: N-Glycan biosynthesis	Bulk	0.0835881	Sub-network 1
ko00130	1.8 Metabolism of cofactors and vitamins	ko00130: Ubiquinone and other terpenoid-quinone biosynthesis	equal	0.533696	Sub-network 1
ko00730	1.8 Metabolism of cofactors and vitamins	ko00730: Thiamine metabolism	Bulk	0.881032	Sub-network 1
ko00760	1.8 Metabolism of cofactors and vitamins	ko00760: Nicotinate and nicotinamide metabolism	Bulk	0.832741	Sub-network 1
ko00785	1.8 Metabolism of cofactors and vitamins	ko00785: Lipoic acid metabolism	equal	1.91481	Sub-network 1
ko00540	1.9 Metabolism of terpenoids and polyketides	ko00540: Lipopolysaccharide biosynthesis	Bulk	0.936753	Sub-network 1
ko01051	1.9 Metabolism of terpenoids and polyketides	ko01051: Biosynthesis of ansamycins	equal	2.91554	Sub-network 1
ko01055	1.9 Metabolism of terpenoids and polyketides	ko01055: Biosynthesis of vancomycin group antibiotic	equal	2.09717	Sub-network 1
ko00970	2.2 Translation	ko00970: Aminoacyl-tRNA biosynthesis	Bulk	1.2898	Sub-network 1
ko04122	2.3 Folding, sorting and degradation	ko04122: Sulfur relay system	Bulk	1.11955	Sub-network 1
ko03420	2.4 Replication and repair	ko03420: Nucleotide excision repair	Bulk	0.678976	Sub-network 1
ko03430	2.4 Replication and repair	ko03430: Mismatch repair	equal	0.900415	Sub-network 1
ko03450	2.4 Replication and repair	ko03450: Non-homologous end-joining	Bulk	0.535695	Sub-network 1
ko04112	4.2 Cell growth and death	ko04112: Cell cycle - Caulobacter	Bulk	1.27678	Sub-network 1
ko00627	1.11 Xenobiotics biodegradation and metabolism	ko00627: Aminobenzoate degradation	Rhizo	0.470043	Sub-network 2
ko00930	1.11 Xenobiotics biodegradation and metabolism	ko00930: Caprolactam degradation	Rhizo	0.850507	Sub-network 2
ko00362	1.11 Xenobiotics biodegradation and metabolism	ko00362: Benzoate degradation	Rhizo	0.658588	Sub-network 2
ko00622	1.11 Xenobiotics biodegradation and metabolism	ko00622: Xylene degradation	Rhizo	0.236767	Sub-network 2
ko00624	1.11 Xenobiotics biodegradation and metabolism	ko00624: Polycyclic aromatic hydrocarbon degradation	Rhizo	0.286469	Sub-network 2
ko00363	1.11 Xenobiotics biodegradation and metabolism	ko00363: Bisphenol degradation	equal	0.276698	Sub-network 2
ko00980	1.11 Xenobiotics biodegradation and metabolism	ko00980: Metabolism of xenobiotics by cytochrome P450	equal	0.857189	Sub-network 2
ko00072	1.3 Lipid metabolism	ko00072: Synthesis and degradation of ketone bodies	Rhizo	2.16417	Sub-network 2
ko00071	1.3 Lipid metabolism	ko00071: Fatty acid metabolism	Rhizo	1.1292	Sub-network 2
ko00360	1.5 Amino acid metabolism	ko00360: Phenylalanine metabolism	Rhizo	0.640214	Sub-network 2
ko00280	1.5 Amino acid metabolism	ko00280: Valine, leucine and isoleucine degradation	equal	1.26765	Sub-network 2
ko00310	1.5 Amino acid metabolism	ko00310: Lysine degradation	Rhizo	0.655075	Sub-network 2
ko00350	1.5 Amino acid metabolism	ko00350: Tyrosine metabolism	Rhizo	0.595774	Sub-network 2
ko00380	1.5 Amino acid metabolism	ko00380: Tryptophan metabolism	equal	0.848091	Sub-network 2
ko00410	1.6 Metabolism of other amino acids	ko00410: beta-Alanine metabolism	equal	0.904949	Sub-network 2
ko00281	1.9 Metabolism of terpenoids and polyketides	ko00281: Geraniol degradation	Rhizo	0.846713	Sub-network 2
ko03320	5.2 Endocrine system	ko03320: PPAR signaling pathway	equal	0.339734	Sub-network 2
ko00500	1.1 Carbohydrate metabolism	ko00500: Starch and sucrose metabolism	equal	0.742454	Sub-network 3
ko00040	1.1 Carbohydrate metabolism	ko00040: Pentose and glucuronate interconversions	equal	0.650275	Sub-network 3
ko00052	1.1 Carbohydrate metabolism	ko00052: Galactose metabolism	equal	0.523339	Sub-network 3
ko00562	1.1 Carbohydrate metabolism	ko00562: Inositol phosphate metabolism	equal	0.47162	Sub-network 3
ko00940	1.10 Biosynthesis of other secondary metabolites	ko00940: Phenylpropanoid biosynthesis	Rhizo	0.431741	Sub-network 3
ko00960	1.10 Biosynthesis of other secondary metabolites	ko00960: Tropane, piperidine and pyridine alkaloid biosynthesis	equal	0.471988	Sub-network 3
ko00195	1.2 Energy metabolism	ko00195: Photosynthesis	equal	0.310987	Sub-network 3
ko00600	1.3 Lipid metabolism	ko00600: Sphingolipid metabolism	equal	0.280287	Sub-network 3
ko00564	1.3 Lipid metabolism	ko00564: Glycerophospholipid metabolism	Rhizo	0.452723	Sub-network 3
ko00430	1.6 Metabolism of other amino acids	ko00430: Taurine and hypotaurine metabolism	equal	0.890339	Sub-network 3
ko00440	1.6 Metabolism of other amino acids	ko00440: Phosphonate and phosphinate metabolism	Rhizo	0.159045	Sub-network 3
ko00511	1.7 Glycan biosynthesis and metabolism	ko00511: Other glycan degradation	equal	0.508812	Sub-network 3
ko03050	2.3 Folding, sorting and degradation	ko03050: Proteasome	equal	0.0322212	Sub-network 3
ko02040	4.5 Cell motility	ko02040: Flagellar assembly	Rhizo	0.596997	Sub-network 3
ko02030	4.5 Cell motility	ko02030: Bacterial chemotaxis	Rhizo	1.29451	Sub-network 3
ko00190	1.2 Energy metabolism	ko00190: Oxidative phosphorylation	equal	0.737008	Sub-network 4
ko00230	1.4 Nucleotide metabolism	ko00230: Purine metabolism	equal	0.659938	Sub-network 4
ko00240	1.4 Nucleotide metabolism	ko00240: Pyrimidine metabolism	Bulk	0.748843	Sub-network 4
ko00670	1.8 Metabolism of cofactors and vitamins	ko00670: One carbon pool by folate	equal	1.07384	Sub-network 4
ko00906	1.9 Metabolism of terpenoids and polyketides	ko00906: Carotenoid biosynthesis	equal	0.0778186	Sub-network 4
ko03010	2.2 Translation	ko03010: Ribosome	equal	1.42274	Sub-network 4
ko03018	2.3 Folding, sorting and degradation	ko03018: RNA degradation	equal	0.512092	Sub-network 4
ko03060	2.3 Folding, sorting and degradation	ko03060: Protein export	equal	0.888145	Sub-network 4
ko03440	2.4 Replication and repair	ko03440: Homologous recombination	equal	0.685255	Sub-network 4
ko02010	3.1 Membrane transport	ko02010: ABC transporters	equal	0.845078	Sub-network 4
ko04626	5.10 Environmental adaptation	ko04626: Plant-pathogen interaction	equal	0.135881	Sub-network 4
ko00650	1.1 Carbohydrate metabolism	ko00650: Butanoate metabolism	equal	1.22628	N/SN*
ko00640	1.1 Carbohydrate metabolism	ko00640: Propanoate metabolism	equal	1.18389	N/SN
ko00620	1.1 Carbohydrate metabolism	ko00620: Pyruvate metabolism	equal	1.30812	N/SN
ko00630	1.1 Carbohydrate metabolism	ko00630: Glyoxylate and dicarboxylate metabolism	equal	1.05387	N/SN
ko00401	1.10 Biosynthesis of other secondary metabolites	ko00401: Novobiocin biosynthesis	equal	0.142681	N/SN
ko00791	1.11 Xenobiotics biodegradation and metabolism	ko00791: Atrazine degradation	equal	0.360972	N/SN
ko00642	1.11 Xenobiotics biodegradation and metabolism	ko00642: Ethylbenzene degradation	equal	0.101839	N/SN
ko00621	1.11 Xenobiotics biodegradation and metabolism	ko00621: Dioxin degradation	equal	0.222431	N/SN
ko00633	1.11 Xenobiotics biodegradation and metabolism	ko00633: Nitrotoluene degradation	equal	1.00702	N/SN
ko00983	1.11 Xenobiotics biodegradation and metabolism	ko00983: Drug metabolism - other enzymes	equal	0.321865	N/SN
ko00910	1.2 Energy metabolism	ko00910: Nitrogen metabolism	equal	0.468856	N/SN
ko00680	1.2 Energy metabolism	ko00680: Methane metabolism	equal	0.458495	N/SN
ko00100	1.3 Lipid metabolism	ko00100: Steroid biosynthesis	equal	0.10722	N/SN
ko00121	1.3 Lipid metabolism	ko00121: Secondary bile acid biosynthesis	equal	0.0933796	N/SN
ko00120	1.3 Lipid metabolism	ko00120: Primary bile acid biosynthesis	equal	0.0564858	N/SN
ko00460	1.6 Metabolism of other amino acids	ko00460: Cyanoamino acid metabolism	equal	0.626768	N/SN
ko00550	1.7 Glycan biosynthesis and metabolism	ko00550: Peptidoglycan biosynthesis	equal	0.92619	N/SN
ko00860	1.8 Metabolism of cofactors and vitamins	ko00860: Porphyrin and chlorophyll metabolism	equal	0.468235	N/SN
ko03410	2.4 Replication and repair	ko03410: Base excision repair	equal	1.02739	N/SN
ko03070	3.1 Membrane transport	ko03070: Bacterial secretion system	equal	0.641558	N/SN
ko05111	4.4 Cellular community - prokaryotes	ko05111: Vibrio cholerae pathogenic cycle	equal	0.13354	N/SN
* - Not assosiated with sub-networks
